# Supplementary material
Source: HighWire-hosted journal article supplement (https://sit.bmj.com/content/3/1/e000084)
Supplement: inline-supplementary-material-1 [file inline-supplementary-material-1.pdf]

## Build of Materials

| Part                                  | Description                                                    | Product Code                                                                                                                                                                                                                                                                                               |
|---------------------------------------|----------------------------------------------------------------|------------------------------------------------------------------------------------------------------------------------------------------------------------------------------------------------------------------------------------------------------------------------------------------------------------|
| SMAC Linear Actuator                  | 25 mm stroke; 48 volts                                         | <a href="https://www.smac-mca.com/lca-series-p-15.html?cPath=1_4">https://www.smac-mca.com/lca-series-p-15.html?cPath=1_4</a><br>LCA 50-025-72-1F-3                                                                                                                                                        |
| Power Supply                          | 48 volt                                                        | Generic                                                                                                                                                                                                                                                                                                    |
| Omega Load Cell                       | Miniature universal load cell with $\pm 5$ kgF range           | <a href="https://www.omega.com/pptst/LCM703.html">https://www.omega.com/pptst/LCM703.html</a><br>LCM703-5                                                                                                                                                                                                  |
| LAC-1 Controller                      | Single axis controller; 12-48 volts                            | <a href="https://www.smac-mca.com/lac-single-axis-controller-p-127.html">https://www.smac-mca.com/lac-single-axis-controller-p-127.html</a>                                                                                                                                                                |
| LAC-1 Communication Kit               | Used for interfacing with the controller                       | Bundled with LAC-1 Controller                                                                                                                                                                                                                                                                              |
| Omega Load Cell Strain Gage Amplifier | Bridge excitation of 4 to 15 volts; adjustable gain and offset | <a href="https://www.omega.ca/en/communication-and-connectivity/signal-conditioners-and-transmitters/signal-conditioners/dmd-465-series/p/DMD-465">https://www.omega.ca/en/communication-and-connectivity/signal-conditioners-and-transmitters/signal-conditioners/dmd-465-series/p/DMD-465</a><br>DMD-465 |
| End-Feed Fastener                     | M6 thread for 30 mm high rail T-slotted framing                | <a href="https://www.mcmaster.com/5537t527">https://www.mcmaster.com/5537t527</a><br>McMaster-Carr part 5537T527                                                                                                                                                                                           |
| T-Slotted Framing Single Rail         | 1 ft, 30 mm x 30 mm                                            | <a href="https://www.mcmaster.com/5537t97">https://www.mcmaster.com/5537t97</a><br>McMaster-Carr part 5537T97                                                                                                                                                                                              |
| T-Slotted Framing Corner Brackets     | For 30 mm                                                      | <a href="https://www.mcmaster.com/5537t936">https://www.mcmaster.com/5537t936</a><br>McMaster-Carr part 5537T936                                                                                                                                                                                           |

|                                          |                  |                                                                                                                     |
|------------------------------------------|------------------|---------------------------------------------------------------------------------------------------------------------|
| 316 Stainless Steel Threaded Rod (20 mm) | M6; 1 mm x 20 mm | <a href="https://www.mcmaster.com/98863a243">https://www.mcmaster.com/98863a243</a><br>McMaster-Carr part 98863A243 |
| 316 Stainless Steel Threaded Rod (40 mm) | M6; 1 mm x 40 mm | <a href="https://www.mcmaster.com/98863a260">https://www.mcmaster.com/98863a260</a><br>McMaster-Carr part 98863A260 |
| 316 Stainless Steel Thin Hex Nut (M6)    | M6; 1 mm         | <a href="https://www.mcmaster.com/93935a335">https://www.mcmaster.com/93935a335</a><br>McMaster-Carr part 93935A335 |
| 316 Stainless Steel Thin Hex Nut (M3)    | M3; 0.5 mm       | <a href="https://www.mcmaster.com/93935a320">https://www.mcmaster.com/93935a320</a><br>McMaster-Carr part 93935A320 |
| Aluminum Plate                           | 6061 aluminum    | Custom milled                                                                                                       |
